# Supplementary material
Source: PubMed Central journal article supplement (PMC7964141)
Supplement: 1804_tables.pdf [file 1804_tables.pdf]

**On-line Table 1: Volumetric aSAH patient and control individual characteristics expressed as means  $\pm$  SD or counts**

| Demographics               | Endovascular Patients<br>(n = 40) |            | <i>P</i> <sup>a</sup> | Surgical Patients<br>(n = 36) |            | <i>P</i> <sup>b</sup> | Control Subjects<br>(n = 30) |
|----------------------------|-----------------------------------|------------|-----------------------|-------------------------------|------------|-----------------------|------------------------------|
|                            | Mean $\pm$ SD                     |            |                       | Mean $\pm$ SD                 |            |                       |                              |
| Age (y)                    | 50.2 $\pm$ 14.5                   |            | .970                  | 50.3 $\pm$ 15.5               |            | .241                  | 54.1 $\pm$ 15.5              |
| Sex (F/M)                  |                                   |            | .151                  |                               |            | .896                  |                              |
| Female                     |                                   | 19 (47.5%) |                       |                               | 23 (63.9%) |                       | 17 (56.7%)                   |
| Male                       |                                   | 21 (52.5%) |                       |                               | 13 (36.1%) |                       | 13 (43.3%)                   |
| HH grade                   |                                   |            | .447                  |                               |            |                       |                              |
| I–II                       |                                   | 28 (70%)   |                       |                               | 27 (75%)   |                       |                              |
| III                        |                                   | 8 (20%)    |                       |                               | 8 (22.2%)  |                       |                              |
| IV–V                       |                                   | 4 (10%)    |                       |                               | 1 (2.8%)   |                       |                              |
| Fisher grade               |                                   |            | .705                  |                               |            |                       |                              |
| 1–2                        |                                   | 15 (37.5%) |                       |                               | 12 (33.3%) |                       |                              |
| 3–4                        |                                   | 25 (62.5%) |                       |                               | 24 (66.7%) |                       |                              |
| Preoperative hydrocephalus |                                   | 16 (40%)   | .390                  |                               | 11 (30.6%) |                       |                              |
| GOS 12 month               |                                   |            | .124                  |                               |            |                       |                              |
| V                          |                                   | 37 (92.5%) |                       |                               | 29 (80.6%) |                       |                              |
| IV                         |                                   | 3 (7.5%)   |                       |                               | 7 (19.4%)  |                       |                              |

**Note:**—The differences between patient groups have been analyzed with the  $\chi^2$  test (categorical data and dichotomous variables) and the Student *t* test (age).

<sup>a</sup> Refers to the comparison in patients after endovascular vs surgical treatment.

<sup>b</sup> Refers to comparison between patients with aSAH and control subjects.

| <b>On-line Table 2: Associations of clinical and radiologic findings with enlargement of ventricles and other CSF volumes after aSAH</b> |             |          |              |          |
|------------------------------------------------------------------------------------------------------------------------------------------|-------------|----------|--------------|----------|
| Description                                                                                                                              | Mean mCMI   | <i>P</i> | Mean CSF/ICV | <i>P</i> |
| Preoperative hydrocephalus                                                                                                               |             | <.001    |              | .051     |
| No ( <i>n</i> = 27)                                                                                                                      | 0.21 ± 0.06 |          | 34.44 ± 7.57 |          |
| Yes ( <i>n</i> = 49)                                                                                                                     | 0.28 ± 0.06 |          | 37.64 ± 5.35 |          |
| HH grade                                                                                                                                 |             | <.001    |              | .293     |
| I–II ( <i>n</i> = 55)                                                                                                                    | 0.21 ± 0.06 |          | 34.98 ± 7.54 |          |
| III–V ( <i>n</i> = 21)                                                                                                                   | 0.29 ± 0.05 |          | 37.15 ± 5.18 |          |
| Fisher grade                                                                                                                             |             | .001     |              | .014     |
| 0–2 ( <i>n</i> = 27)                                                                                                                     | 0.20 ± 0.06 |          | 32.75 ± 7.75 |          |
| 3–4 ( <i>n</i> = 49)                                                                                                                     | 0.25 ± 0.06 |          | 37.13 ± 6.10 |          |
| MRI lesion                                                                                                                               |             | .039     |              | .001     |
| No ( <i>n</i> = 25)                                                                                                                      | 0.21 ± 0.07 |          | 31.39 ± 7.52 |          |
| Yes ( <i>n</i> = 51)                                                                                                                     | 0.25 ± 0.07 |          | 37.63 ± 5.77 |          |
| MRI; ischemic lesion                                                                                                                     |             | .347     |              | .222     |
| No ( <i>n</i> = 46)                                                                                                                      | 0.23 ± 0.07 |          | 34.49 ± 7.73 |          |
| yes ( <i>n</i> = 30)                                                                                                                     | 0.24 ± 0.06 |          | 37.25 ± 5.43 |          |
| MRI; frontal lesion                                                                                                                      |             | .002     |              | .003     |
| No ( <i>n</i> = 31)                                                                                                                      | 0.21 ± 0.06 |          | 32.59 ± 7.39 |          |
| Yes ( <i>n</i> = 45)                                                                                                                     | 0.25 ± 0.06 |          | 37.63 ± 5.98 |          |
| MRI; temporal lesion                                                                                                                     |             | .180     |              | .006     |
| No ( <i>n</i> = 49)                                                                                                                      | 0.23 ± 0.07 |          | 33.94 ± 7.39 |          |
| Yes ( <i>n</i> = 27)                                                                                                                     | 0.25 ± 0.06 |          | 38.54 ± 5.16 |          |

**Note:**—For calculation of mCMI indexes, the Student *t* test was used. mCMI refers to maximal ventricular width/maximal intracranial width ratio measured from the same axial T2-weighted section. CSF refers to the CSF volume determined by SPM5. Total ICV (contains GM, WM, and CSF segments) was measured by SPM5. For CSF/ICV indexes, the Mann-Whitney U-test was used.

| <b>On-line Table 3: Clinical outcome and neuropsychological and associated MRI findings expressed as counts or means ± SD in 75 patients completing the neuropsychological tests 1 year after aSAH</b> |                                           |                       |                                       |
|--------------------------------------------------------------------------------------------------------------------------------------------------------------------------------------------------------|-------------------------------------------|-----------------------|---------------------------------------|
|                                                                                                                                                                                                        | Endovascular Patients<br>( <i>n</i> = 39) | <i>P</i> <sup>a</sup> | Surgical Patients<br>( <i>n</i> = 36) |
| Clinical outcome                                                                                                                                                                                       |                                           | .135                  |                                       |
| GOS V                                                                                                                                                                                                  | 36 (92.3%)                                |                       | 29 (80.6%)                            |
| GOS IV                                                                                                                                                                                                 | 3 (7.7%)                                  |                       | 7 (19.4%)                             |
| Neuropsychological findings                                                                                                                                                                            |                                           |                       |                                       |
| Any neuropsychological deficit detected                                                                                                                                                                | 19 (48.7%)                                | .069                  | 25 (69.4%)                            |
| Deficit in general intellectual functioning                                                                                                                                                            | 4 (10.8%)                                 | .467                  | 6 (16.7%)                             |
| Memory deficit                                                                                                                                                                                         | 14 (37.8%)                                | .200                  | 19 (52.8%)                            |
| Verbal deficit                                                                                                                                                                                         | 13 (36.1%)                                | .804                  | 12 (33.3%)                            |
| Deficit in executive functions                                                                                                                                                                         | 6 (16.2%)                                 | .053                  | 13 (36.1%)                            |
| MRI findings                                                                                                                                                                                           |                                           |                       |                                       |
| Frontal lobe lesion                                                                                                                                                                                    | 18 (46.2%)                                | .022                  | 26 (72.2%)                            |
| Temporal lobe lesion                                                                                                                                                                                   | 8 (20.5%)                                 | .004                  | 19 (52.8%)                            |
| Parenchymal deficit                                                                                                                                                                                    | 20 (51.3%)                                | .003                  | 30 (83.3%)                            |
| Total parenchymal lesion volume (cm <sup>3</sup> )                                                                                                                                                     | 4.25 ± 12.82                              | <.001                 | 13.12 ± 15.38                         |
| Ischemic brain volume (cm <sup>3</sup> )                                                                                                                                                               | 3.48 ± 12.15                              | .004                  | 6.86 ± 13.62                          |

**Note:**—The differences between patient groups have been analyzed with the  $\chi^2$  test (categorical data and dichotomous variables) and the Mann-Whitney U test (different lesion volumes).  
<sup>a</sup> Refers to the comparison in patients after endovascular vs surgical treatment.

**On-line Table 4: Associations between neuropsychological deficits and enlarged ventricles and other CSF volumes**

| Description                                 | mCMI        | <i>P</i> <sup>a</sup> | CSF/ICV      | <i>P</i> |
|---------------------------------------------|-------------|-----------------------|--------------|----------|
| Clinical outcome                            |             | .028                  |              | .214     |
| GOS 5                                       | 0.23 ± 0.06 |                       | 35.18 ± 7.12 |          |
| GOS 2–4                                     | 0.28 ± 0.06 |                       | 38.16 ± 5.81 |          |
| Any neuropsychological deficit              |             | .028                  |              | .003     |
| No                                          | 0.21 ± 0.05 |                       | 32.66 ± 7.25 |          |
| Yes                                         | 0.25 ± 0.07 |                       | 37.45 ± 6.13 |          |
| Verbal deficit                              |             | .045                  |              | .002     |
| No                                          | 0.22 ± 0.06 |                       | 33.78 ± 6.83 |          |
| Yes                                         | 0.26 ± 0.07 |                       | 38.60 ± 6.38 |          |
| Memory deficit                              |             | .07                   |              | .018     |
| No                                          | 0.22 ± 0.06 |                       | 33.61 ± 7.66 |          |
| Yes                                         | 0.25 ± 0.07 |                       | 37.45 ± 5.61 |          |
| Deficit in general intellectual functioning |             | <.001                 |              | <.001    |
| No                                          | 0.22 ± 0.06 |                       | 34.29 ± 6.94 |          |
| Yes                                         | 0.30 ± 0.04 |                       | 42.02 ± 2.68 |          |
| Deficit in executive functions              |             | .003                  |              | <.001    |
| No                                          | 0.22 ± 0.06 |                       | 33.36 ± 6.80 |          |
| Yes                                         | 0.27 ± 0.06 |                       | 41.00 ± 4.03 |          |

**Note:**—Neuropsychological analysis was available (at least from 1 of the 4 cognitive domains) on 75 volumetric patients (of 76 patients).

<sup>a</sup> Refers to statistical significance between different GOS/neuropsychological deficit subgroups.
